# Supplementary material for: Role of Total, Red, Processed, and White Meat Consumption in Stroke Incidence and Mortality: A Systematic Review and Meta‐Analysis of Prospective Cohort Studies
Source: PubMed Central journal article supplement — J Am Heart Assoc. 2017 Aug 30;6(9):e005983. doi: 10.1161/JAHA.117.005983 (PMC5634267; doi:10.1161/jaha.117.005983), 2017-08-30
Supplement: JAH3-6-e005983-s001.pdf [file JAH3-6-e005983-s001.pdf]

# **SUPPLEMENTAL MATERIAL**

**Table S1. Search Strategy**

|                                                                                                                                   |                                                                                                                                                                                                                                                                                                                                                                                                                                                                                                                                                                                                                                                                                                                                                                                                                                                                                                                                    |
|-----------------------------------------------------------------------------------------------------------------------------------|------------------------------------------------------------------------------------------------------------------------------------------------------------------------------------------------------------------------------------------------------------------------------------------------------------------------------------------------------------------------------------------------------------------------------------------------------------------------------------------------------------------------------------------------------------------------------------------------------------------------------------------------------------------------------------------------------------------------------------------------------------------------------------------------------------------------------------------------------------------------------------------------------------------------------------|
| <p><b>PudMed</b><br/>(<a href="https://www.ncbi.nlm.nih.gov/pubmed">https://www.ncbi.nlm.nih.gov/pubmed</a>)<br/>2016.10.07</p>   | <p>((“meat”[tw] OR “meats”[tiab] OR “meat product”[tiab] OR “meat products”[tw] OR “red meat”[tw] OR “red meats”[tiab] OR beef[tiab] OR veal[tiab] OR goat[tiab] OR lamb[tiab] OR pork[tiab] OR mutton[tiab] OR sausage[tiab] OR sausages[tiab] OR ham[tiab] OR hams[tiab] OR pastrami[tiab] OR bacon[tiab] OR bacons[tiab] OR salami[tiab] OR salamis[tiab] OR “hot dog”[tiab] OR “hot dogs”[tiab] OR “animal food”[tiab] OR “animal foods”[tiab] OR “animal protein”[tiab] OR “animal proteins”[tiab] OR “diet”[tiab] OR “diets” [tiab] OR “dietary” [tiab] OR “white meat”[tiab] OR “poultry”[tiab] OR “chicken”[tiab] OR “duck”[tiab] OR “turkey”[tiab] OR “rabbit”[tiab]) AND ((“stroke”[tiab]) “Ischemic stroke”[tiab] OR “hemorrhagic stroke”[tiab] OR “cerebrovascular disease”[tiab] OR “cerebrovascular attack”[tiab] OR “cerebral infarct”[tiab] OR “intracranial hemorrhage”[tiab]))</p>                               |
| <p><b>EMBASE</b><br/>(<a href="http://www.embase.com/">http://www.embase.com/</a>)<br/>2016.10.07</p>                             | <p>(‘meat’:ab,ti OR ‘meats’:ab,ti OR ‘meat product’:ab,ti OR ‘meat products’:ab,ti OR ‘red meat’:ab,ti OR ‘red meats’:ab,ti OR ‘beef’:ab,ti OR ‘veal’:ab,ti OR ‘goat’:ab,ti OR ‘lamb’:ab,ti OR ‘pork’:ab,ti OR ‘mutton’:ab,ti OR ‘sausage’:ab,ti OR ‘sausages’:ab,ti OR ‘ham’:ab,ti OR ‘hams’:ab,ti OR ‘pastrami’:ab,ti OR ‘bacon’:ab,ti OR ‘bacons’:ab,ti OR ‘salami’:ab,ti OR ‘salamis’:ab,ti OR ‘hot dog’:ab,ti OR ‘hot dogs’:ab,ti OR ‘animal food’:ab,ti OR ‘animal foods’:ab,ti OR ‘animal protein’:ab,ti OR ‘animal proteins’:ab,ti OR ‘diet’:ab,ti OR ‘diets’:ab,ti OR ‘dietary’:ab,ti OR ‘white meat’:ab,ti OR ‘poultry’:ab,ti OR ‘chicken’:ab,ti OR ‘duck’:ab,ti OR ‘turkey’:ab,ti OR ‘rabbit’:ab,ti) AND (‘stroke’:ab,ti ‘Ischemic stroke’:ab,ti OR ‘hemorrhagic stroke’:ab,ti OR ‘cerebrovascular disease’:ab,ti OR ‘cerebrovascular attack’:ab,ti OR ‘cerebral infarct’:ab,ti OR ‘intracranial hemorrhage’:ab,ti)</p> |
| <p><b>Cochrane Library</b><br/>(<a href="http://www.cochranelibrary.com/">http://www.cochranelibrary.com/</a>)<br/>2016.10.07</p> | <p>(‘meat’ OR ‘meats’ OR ‘meat product’ OR ‘meat products’ OR ‘red meat’ OR ‘red meats’ OR ‘beef’ OR ‘veal’ OR ‘goat’ OR ‘lamb’ OR ‘pork’ OR ‘mutton’ OR ‘sausage’ OR ‘sausages’ OR ‘ham’ OR ‘hams’ OR ‘pastrami’ OR ‘bacon’ OR ‘bacons’ OR ‘salami’ OR ‘salamis’ OR ‘hot dog’</p>                                                                                                                                                                                                                                                                                                                                                                                                                                                                                                                                                                                                                                                 |

|  |                                                                                                                                                                                                                                                                                                                                                                                        |
|--|----------------------------------------------------------------------------------------------------------------------------------------------------------------------------------------------------------------------------------------------------------------------------------------------------------------------------------------------------------------------------------------|
|  | OR 'hot dogs' OR 'animal food' OR 'animal foods' OR 'animal protein' OR 'animal proteins' OR 'diet' OR 'diets' OR 'dietary' OR 'white meat' OR 'poultry' OR 'chicken' OR 'duck' OR 'turkey' OR 'rabbit') <b>AND</b> ('stroke' OR Ischemic stroke' OR 'hemorrhagic stroke' OR 'cerebrovascular disease' OR 'cerebrovascular attack' OR 'cerebral infarct' OR 'intracranial hemorrhage') |
|--|----------------------------------------------------------------------------------------------------------------------------------------------------------------------------------------------------------------------------------------------------------------------------------------------------------------------------------------------------------------------------------------|

tw=Text Words, ab,ti/tiab=Title/Abstract

**Table S2.** Quality assessment of studies selected for final meta-analysis based on the Newcastle-Ottawa Scale

| Studies<br>(n =10)      | Selection                                |                                     |                           | Comparability                                     |                                                   |                       | Outcome                                      |                                  | Total score<br>(0-9) |
|-------------------------|------------------------------------------|-------------------------------------|---------------------------|---------------------------------------------------|---------------------------------------------------|-----------------------|----------------------------------------------|----------------------------------|----------------------|
|                         | Representativeness of the exposed cohort | Selection of the non exposed cohort | Ascertainment of exposure | Outcome of interest not present at start of study | Control for important factor or additional factor | Assessment of outcome | Follow-up long enough form outcomes to occur | Adequacy of follow up of cohorts |                      |
| <b>Stroke Incidence</b> |                                          |                                     |                           |                                                   |                                                   |                       |                                              |                                  |                      |
| 1                       | Larsson et al, 2011 <sup>1</sup>         | 1                                   | 1                         | 1                                                 | 1                                                 | 1                     | 1                                            | 1                                | 8                    |
| 2                       | Larsson et al, 2011 <sup>2</sup>         | 1                                   | 1                         | 1                                                 | 1                                                 | 1                     | 1                                            | 1                                | 8                    |
| 3                       | Bernstein et al, 2012 <sup>3</sup>       | 0                                   | 1                         | 1                                                 | 1                                                 | 1                     | 1                                            | 1                                | 7                    |
| 4                       | Bernstein et al, 2012 <sup>3</sup>       | 0                                   | 1                         | 1                                                 | 1                                                 | 1                     | 1                                            | 1                                | 7                    |
| 5                       | Haring et al, 2015 <sup>4</sup>          | 1                                   | 1                         | 1                                                 | 0                                                 | 1                     | 1                                            | 1                                | 7                    |
| 6                       | Amiano et al, 2016 <sup>5</sup>          | 1                                   | 1                         | 1                                                 | 0                                                 | 1                     | 1                                            | 1                                | 7                    |
| 7                       | Amiano et al, 2016 <sup>5</sup>          | 1                                   | 1                         | 1                                                 | 0                                                 | 1                     | 1                                            | 1                                | 7                    |
| <b>Stroke Mortality</b> |                                          |                                     |                           |                                                   |                                                   |                       |                                              |                                  |                      |
| 8                       | Sauvaget et al, 2003 <sup>6</sup>        | 0                                   | 1                         | 1                                                 | 1                                                 | 1                     | 1                                            | 1                                | 7                    |
| 9                       | Yaemsiri et al, 2012 <sup>7</sup>        | 0                                   | 1                         | 1                                                 | 0                                                 | 1                     | 1                                            | 1                                | 6                    |
| 10                      | Nagano et al, 2012 <sup>8</sup>          | 0                                   | 1                         | 1                                                 | 0                                                 | 1                     | 1                                            | 1                                | 6                    |
| 11                      | Nagano et al, 2012 <sup>8</sup>          | 0                                   | 1                         | 1                                                 | 0                                                 | 1                     | 1                                            | 1                                | 6                    |
| 12                      | Sharma et al, 2013 <sup>9</sup>          | 1                                   | 1                         | 1                                                 | 1                                                 | 1                     | 1                                            | 1                                | 8                    |
| 13                      | Sharma et al, 2013 <sup>9</sup>          | 1                                   | 1                         | 1                                                 | 1                                                 | 1                     | 1                                            | 1                                | 8                    |
| 14                      | Takata et al, 2013 <sup>10</sup>         | 1                                   | 1                         | 1                                                 | 0                                                 | 1                     | 1                                            | 1                                | 7                    |
| 15                      | Takata et al, 2013 <sup>10</sup>         | 1                                   | 1                         | 1                                                 | 0                                                 | 1                     | 1                                            | 1                                | 7                    |

## Supplemental References:

1. Larsson SC, Virtamo J, Wolk A. Red meat consumption and risk of stroke in swedish women. *Stroke*. 2011;42:324-329.
2. Larsson SC, Virtamo J, Wolk A. Red meat consumption and risk of stroke in swedish men. *Am J Clin Nutr*. 2011;94:417-421.
3. Bernstein AM, Pan A, Rexrode KM, Stampfer M, Hu FB, Mozaffarian D, Willett WC. Dietary protein sources and the risk of stroke in men and women. *Stroke*. 2012;43:637-644.
4. Haring B, Misialek JR, Rebholz CM, Petruski-Ivleva N, Gottesman RF, Mosley TH, Alonso A. Association of dietary protein consumption with incident silent cerebral infarcts and stroke the atherosclerosis risk in communities (aric) study. *Stroke*. 2015;46:3443-3450.
5. Amiano P, Chamosa S, Etxezarreta N, Arriola L, Sánchez M, Ardanaz E, Molina-Montes E, Chirlaque M, Moreno-Iribas C, Huerta J. Unprocessed red meat and processed meat consumption and risk of stroke in the spanish cohort of the european prospective investigation into cancer and nutrition (epic). *Eur J Clin Nutr*. 2016;70:313-9.
6. Sauvaget C, Nagano J, Allen N, Grant EJ, Beral V. Intake of animal products and stroke mortality in the hiroshima/nagasaki life span study. *Int J Epidemiol*. 2003;32:536-543.
7. Yaemsiri S, Sen S, Tinker L, Rosamond W, Wassertheil, Smoller S, He K. Trans fat, aspirin, and ischemic stroke in postmenopausal women. *Ann Neurol*. 2012;72:704-715.
8. Nagao M, Iso H, Yamagishi K, Date C, Tamakoshi A. Meat consumption in relation to mortality from cardiovascular disease among japanese men and women. *Eur J Clin Nutr*. 2012;66:687-693.
9. Sharma S, Cruickshank JK, Green DM, Vik S, Tome A, Kolonel LN. Impact of diet on mortality from stroke: Results from the us multiethnic cohort study. *J Am Coll Nutr*. 2013;32:151-159.
10. Takata Y, Shu X-O, Gao Y-T, Li H, Zhang X, Gao J, Cai H, Yang G, Xiang Y-B, Zheng W. Red meat and poultry intakes and risk of total and cause-specific mortality: Results from cohort studies of chinese adults in shanghai. *PLoS One*. 2013;8:e56963.
